# Supplementary material
Source: ML conference proceedings conference paper supplement (https://openreview.net/forum?id=W5S1DEjN8x)
Supplement: supplementary_material [file attachment]

# PRACTICAL $\epsilon$ -EXPLORING THOMPSON SAMPLING FOR REINFORCEMENT LEARNING WITH CONTINUOUS CONTROLS

**Anonymous authors**

Paper under double-blind review

## A ADDITIONAL RESULTS

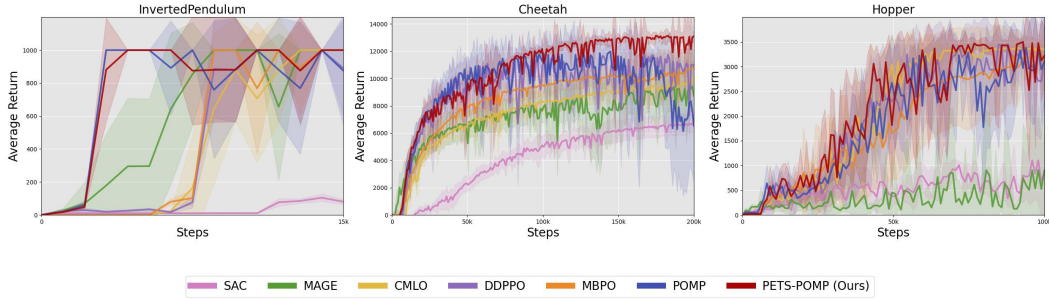

Figure 1: Learning curves of PETS-POMP (Ours) and baselines on three continuous control tasks from OpenAI Gym benchmark. The solid lines represent the mean and the shaded areas represent the standard deviation among trials of 8 different seeds. As shown in the figure, our method achieves better performance compared to baselines on InvertedPendulum and Cheetah while achieving comparable results on Hopper. Moreover, PETS-POMP outperforms POMP on all tasks while also improving its training stability.

## B IMPLEMENTATION DETAILS

In this section, we provide some details for the implementation of our method.

### B.1 DBAS DETAILS

Here we provide more implementation details for DBAS (?). The pseudocode for DBAS procedure can be found in Algorithm 1. In our method, we use a mixture of Gaussians as the generative model  $G$ . We use the Expectation-Maximization (E-M) algorithm (?) to train the mixture of Gaussians. Furthermore, we use an initial set of actions drawn from the policy for  $x_{\text{init}}$ . We repeat the DBAS procedure (Line 5 of Algorithm 1) for 10-20 iterations.

### B.2 HYPERPARAMETERS

In Table 1 and Table 2 and 3 we present the set of hyperparameters used in PETS-POMP, PETS-MBPO and PETS-SAC respectively.

### B.3 ACTION INITIALIZATION

As we leverage gradient-based optimization to find the approximate optimal action, action initialization can make a difference in the quality of the approximation. This is also supported in our regret analysis in Appendix C. We empirically have found that initializing the action from the action that

**Algorithm 1** DBAS

**Input:** predictor oracle  $O(x)$ ,  $\text{GenTrain}(x_i)$ , percentage of least-performing samples  $[q = 0.9]$ , number of samples  $[M = 1000]$ , initial data set  $[x_{\text{init}} = \emptyset]$

```

1:  $set \leftarrow x_{\text{init}}$ 
2: if  $x_{\text{init}}$  is empty then
3:    $set \leftarrow$  randomly initialized data
4: end if
5: while not converged do
6:    $G \leftarrow \text{GenTrain}(set)$ 
7:    $set \leftarrow x_i \sim G$ 
8:    $scores_i \leftarrow O(x_i)$ 
9:    $set \leftarrow x_i$  if it is not among the  $q^{th}$  percentage least-performing samples based on  $scores$ 
10: end while
11: return  $set_0$ 

```

would have been taken by the underlying algorithm without the exploration helps with getting better approximations.

Table 1: Set of hyperparameters used in PETS-POMP.

|                          |                                    | Inverted<br>Pendulum | Walker2d | Cheetah | Ant  | Humanoid | Hopper |
|--------------------------|------------------------------------|----------------------|----------|---------|------|----------|--------|
| $\epsilon$               | exploration<br>probability         | 0.6                  | 0.3      | 0.8     | 0.3  | 0.8      | 0.8    |
| $n_{\text{samples}}$     | number of<br>posterior samples     | 5                    | 5        | 50      | 10   | 5        | 10     |
| $n_{\text{grad\_steps}}$ | number of gradient<br>ascent steps | 40                   | 100      | 100     | 60   | 100      | 50     |
| $\eta'$                  | gradient ascent<br>learning rate   | 0.002                | 0.01     | 0.01    | 0.05 | 0.05     | 0.005  |

Table 2: Set of hyperparameters used in PETS-POMP.

|                          |                                    | Cheetah | Ant  | Hopper |
|--------------------------|------------------------------------|---------|------|--------|
| $\epsilon$               | exploration<br>probability         | 0.8     | 0.4  | 0.4    |
| $n_{\text{samples}}$     | number of<br>posterior samples     | 50      | 5    | 5      |
| $n_{\text{grad\_steps}}$ | number of gradient<br>ascent steps | 100     | 40   | 40     |
| $\eta'$                  | gradient ascent<br>learning rate   | 0.01    | 0.01 | 0.01   |

Table 3: Set of hyperparameters used in PETS-SAC.

|                          |                                    | Cheetah | Ant  | Hopper |
|--------------------------|------------------------------------|---------|------|--------|
| $\epsilon$               | exploration<br>probability         | 0.7     | 0.4  | 1.0    |
| $n_{\text{samples}}$     | number of<br>posterior samples     | 5       | 5    | 5      |
| $n_{\text{grad\_steps}}$ | number of gradient<br>ascent steps | 20      | 40   | 80     |
| $\eta'$                  | gradient ascent<br>learning rate   | 0.02    | 0.01 | 0.01   |

## C REGRET ANALYSIS

We expand upon the regret analysis presented in ?, extending it to approximate greedy policies. We demonstrate that under certain assumptions on the action-value function, the regret bound of  $\tilde{O}\left(d^{3/2}H^{3/2}\sqrt{T}\right)$  can be achieved, even when the optimal action  $a^*$  cannot be trivially identified and has to be approximated.

To this end, we first state the analysis setting. Consider an episodic MDP of the form  $(S, \mathcal{A}, H, \mathbb{P}, r)$  where  $S$  is the state space,  $\mathcal{A}$  is the continuous action space,  $H$  is the episode length,  $\mathbb{P} = \{\mathbb{P}_h\}_{h=1}^H$  are the state transition probability distributions, and  $r = \{r_h\}_{h=1}^H$  are the reward functions where  $r_h : S \times \mathcal{A} \rightarrow [0, 1]$ .

Furthermore,  $\pi_h(x)$  denotes the action that the agent takes in the state  $x$  at the  $h$ -th step in the episode, and  $\pi$  is the set of policies. The value and action-value functions are defined as:

$$V_h^\pi(x) = \mathbb{E}_\pi \left[ \sum_{h'=h}^H r_{h'}(x_{h'}, a_{h'}) \mid x_h = x \right].$$

$$Q_h^\pi(x, a) = \mathbb{E}_\pi \left[ \sum_{h'=h}^H r_{h'}(x_{h'}, a_{h'}) \mid x_h = x, a_h = a \right].$$

The Bellman equation and Bellman optimality equations are as follows:

$$Q_h^\pi(x, a) = (r_h + \mathbb{P}_h V_{h+1}^\pi)(x, a), \quad V_h^\pi(x) = Q_h^\pi(x, \pi_h(x)), \quad V_{H+1}^\pi(x) = 0.$$

$$Q_h^*(x, a) = (r_h + \mathbb{P}_h V_{h+1}^*)(x, a), \quad V_h^*(x) = Q_h^*(x, \pi_h^*(x)), \quad V_{H+1}^*(x) = 0.$$

where  $V_h^*(x) = V_h^{\pi^*}(x)$ ,  $Q_h^*(x, a) = Q_h^{\pi^*}(x, a)$ ,  $\pi^*$  is the optimal policy and  $[\mathbb{P}_h V_{h+1}](x, a) = \mathbb{E}_{x' \sim \mathbb{P}_h(\cdot \mid x, a)} V_{h+1}(x')$ .

We measure the suboptimality of an agent by the total regret defined as

$$\text{Regret}(K) = \sum_{k=1}^K \left[ V_1^*(x_1^k) - V_1^{\pi^k}(x_1^k) \right] \quad (1)$$

where  $x_1^k$  is the initial state and  $\pi_k$  is the policy agent uses for episode  $k$ . and  $K$  is the total number of episodes which the agent interacts with the environment with the goal of learning the optimal policy.

Consider the following loss function for the action-value function from ?:

$$L_h^k(w_h) = \sum_{\tau=1}^{k-1} \left[ r_h(x_h^\tau, a_h^\tau) + \max_{a \in \mathcal{A}} Q_{h+1}^k(x_{h+1}^\tau, a) - Q(w_h; \phi(x_h^\tau, a_h^\tau)) \right]^2 + \lambda \|w_h\|^2 \quad (2)$$

where  $\phi(\cdot, \cdot)$  is a feature vector,  $w_h$  is the Q function parameters and  $\lambda$  is the regularization constant. We consider a linear function approximation for the Q function and:

$$Q_h^k(\cdot, \cdot) \leftarrow \min \left\{ \phi(\cdot, \cdot)^\top w_h^{k, J_k}, H - h + 1 \right\}^+ \quad (3)$$

where  $w_h^{k, J_k}$  is the parameter vector obtained after  $J_k$  iterations of the Langevin Monte Carlo (LMC) process, applied to the loss function defined in Eq. equation 4, as described in Algorithm 2. We further denote  $V_h^k(x_h^k) = \max_{a \in \mathcal{A}} Q_h^k(x_h^k, a)$ .

Note that while the action-value function  $Q_h^k$  is linear with respect to the parameter vector  $w$ , it is not necessarily linear in the action  $a$ . Furthermore, the loss function  $L_h^k(w_h)$  includes the term  $V_{h+1}^k(x_{h+1}^\tau)$ , which, in a high-dimensional continuous action space, cannot be computed exactly due to infinite actions. Consequently, in Algorithm 2 and our regret analysis, we substitute this term with the approximate value function,  $\hat{V}_h^k$ , as defined in Equation equation ???. This approach leads to the formulation of the following modified loss function:

**Algorithm 2** Langevin Monte Carlo Least-Squares Value Iteration (LMC-LSVI) with Approximate Greedy Policy

---

**Input:** step sizes  $\{\eta_k > 0\}_{k \geq 1}$ , inverse temperature  $\{\beta_k\}_{k \geq 1}$ , loss function  $L_k(w)$

---

```

1: Initialize  $w_h^{1,0} = \mathbf{0}$  for  $h \in [H]$ ,  $J_0 = 0$ 
2: for episode  $k = 1, 2, \dots, K$  do
3:   Receive the initial state  $s_1^k$ 
4:   for step  $h = H, H-1, \dots, 1$  do
5:      $w_h^{k,0} = w_h^{k-1, J_{k-1}}$ 
6:     for  $j = 1, \dots, J_k$  do
7:        $\epsilon_h^{k,j} \sim \mathcal{N}(0, I)$ 
8:        $w_h^{k,j} = w_h^{k,j-1} - \eta_k \nabla L_h^k(w_h^{k,j-1}) + \sqrt{2\eta_k \beta_k^{-1}} \epsilon_h^{k,j}$ 
9:     end for
10:     $Q_h^k(\cdot, \cdot) \leftarrow \min \left\{ Q(w_h^{k, J_k}; \phi(\cdot, \cdot)), H - h + 1 \right\}^+$ 
11:    initialize set of actions  $a_{h,0}^k$ 
12:    for iteration  $t = 1, 2, \dots, t^*$  do
13:       $a_{h,t}^k = a_{h,t-1}^k + \nabla Q(\cdot, a_{h,t-1}^k)$  {as outlined in Eq ??}
14:    end for
15:     $\hat{V}_h^k(\cdot) \leftarrow Q(\cdot, a_{h,t^*}^k)$  {approximate optimal value}
16:  end for
17:  for step  $h = 1, 2, \dots, H$  do
18:    Take approximate optimal action  $a_h^k$  based on  $a_{h,t^*}^k$ , observe reward  $r_h^k(s_h^k, a_h^k)$  and next state  $s_{h+1}^k$ 
19:  end for
20: end for

```

---

$$L_h^k(w_h) = \sum_{\tau=1}^{k-1} \left[ r_h(x_h^\tau, a_h^\tau) + \hat{V}_{h+1}^k(x_{h+1}^\tau) - Q(w_h; \phi(x_h^\tau, a_h^\tau)) \right]^2 + \lambda \|w_h\|^2 \quad (4)$$

We present a modified version of the Langevin Monte Carlo Least Squares Value Iteration (LMC\_LSVI) algorithm (?) in Algorithm 2. Contrasting with Algorithm 1 in ?, Algorithm 2 incorporates the use of an approximate value function, denoted as  $\hat{V}$ , and employs approximate optimal actions. In the subsequent sections, we demonstrate that under certain assumptions about the action-value function, Algorithm 2 achieves the same target regret bound.

**Proposition C.1.** *As defined in ?, let  $w^{k, J_k}$  be the approximation of posterior parameters after  $J_k$  iterations of LMC as defined in Eq ?? for the  $k$ 'th episode where  $h$  is the horizon step. Under the loss defined in Eq 4,  $w^{k, J_k}$  follows a Gaussian distribution where the mean vector and covariance matrix are defined as:*

$$\mu_h^{k, J_k} = A_k^{J_k} \dots A_1^{J_1} w_h^{1,0} + \sum_{i=1}^k A_k^{J_k} \dots A_{i+1}^{J_{i+1}} (I - A_i^{J_i}) \hat{w}_h^i, \quad (5)$$

$$\Sigma_h^{k, J_k} = \sum_{i=1}^k \frac{1}{\beta_i} A_k^{J_k} \dots A_{i+1}^{J_{i+1}} (I - A_i^{2J_i}) (\Lambda_h^i)^{-1} (I + A_i)^{-1} A_{i+1}^{J_{i+1}} \dots A_k^{J_k}, \quad (6)$$

where  $A_i = I - 2\eta_i \Lambda_h^i$  for  $i \in [k]$ .

*Proof.* We refer readers to Proposition B.1 of ? for the proof.  $\square$

**Definition C.2.** (Model Prediction Error). For any  $(k, h) \in [K] \times [H]$ , we define the model prediction error associated with the reward  $r_h$ ,

$$l_h^k(x, a) = r_h(x, a) + \mathbb{P}_h \hat{V}_{h+1}^k(x, a) - Q_h^k(x, a). \quad (7)$$

**Proposition C.3.** For an action-value function  $Q(x, \cdot)$  that has an  $L$ -Lipschitz continuous gradient and satisfies the Polyak-Łojasiewicz Inequality (PL) inequality for some  $\mu > 0$  as stated below:

$$\frac{1}{2} \|\nabla Q_h^k(x, a)\|^2 \geq \mu (Q_h^k(x, a) - Q_h^k(x, a^*)), \quad \forall a. \quad (8)$$

where

$$a^* = \operatorname{argmax}_a Q_h^k(x_h, a)$$

is the optimal action. For  $t^* \geq \left( \frac{L}{\mu} \log(KH \frac{Q_h^k(x_h, a^*) - Q_h^k(x_h, a_0)}{d^{3/2} H^{3/2} \sqrt{T}}) \right)$  iterations we have:

$$V_h^k(x_h) - \hat{V}_h^k(x_h) \leq \varepsilon_{t^*} \quad (9)$$

where  $\varepsilon_{t^*} = \frac{d^{3/2} H^{3/2} \sqrt{T}}{KH}$ .

*Proof.* As proved in Theorem 1. of ?, with the step size of  $\frac{1}{L}$ , for an action-value function  $Q(x, \cdot)$  that has an  $L$ -Lipschitz continuous gradient and satisfies the PL inequality, we have

$$Q_h^k(x_h, a^*) - Q_h^k(x_h, a_t) \leq \left(1 - \frac{\mu}{L}\right)^t (Q_h^k(x_h, a^*) - Q_h^k(x_h, a_0)) \quad (10)$$

where  $a_t$  is the action after  $t$  iteration of gradient ascent:

$$a_{t+1} = a_t + \nabla Q_h^k(x_h, a_t) \quad (11)$$

using  $1 - u \leq \exp(-u)$  on Eq 10 we have

$$Q_h^k(x_h, a^*) - Q_h^k(x_h, a_t) \leq \exp\left(-t \frac{\mu}{L}\right) (Q_h^k(x_h, a^*) - Q_h^k(x_h, a_0)).$$

So for  $t^* \geq \frac{L}{\mu} \log(KH \frac{Q_h^k(x_h, a^*) - Q_h^k(x_h, a_0)}{d^{3/2} H^{3/2} \sqrt{T}})$  we have:

$$Q_h^k(x_h, a^*) - Q_h^k(x_h, a_{t^*}) \leq \frac{d^{3/2} H^{3/2} \sqrt{T}}{KH} = \varepsilon_{t^*} \quad (12)$$

by applying the definition of  $V_h^k$  we have:

$$V_h^k(x_h) - \hat{V}_h^k(x_h) \leq \varepsilon_{t^*} \quad (13)$$

□

**Proposition C.4.** Under the approximate value function  $\hat{V}_h^k$  we have:

$$\mathbb{P}_h V_{h+1}^k(x, a) - \mathbb{P}_h \hat{V}_{h+1}^k(x, a) \leq \varepsilon_{t^*} \quad (14)$$

where  $\varepsilon_{t^*}$  is defined in Proposition C.3

*Proof.* Applying the definition of  $\mathbb{P}_h$  we have:

$$[\mathbb{P}_h V_{h+1}^k](x, a) = \mathbb{E}_{x' \sim \mathbb{P}_h(\cdot | x, a)} V_{h+1}^k(x') \leq \mathbb{E}_{x' \sim \mathbb{P}_h(\cdot | x, a)} \hat{V}_{h+1}^k(x') + \varepsilon_{t^*} \quad (15)$$

$$= [\mathbb{P}_h \hat{V}_{h+1}^k](x, a) + \varepsilon_{t^*} \quad (16)$$

where the first to the second line is by using Proposition C.3. □

**Lemma C.5.** Let  $\lambda = 1$  in Eq 4, Define the following event

$$\begin{aligned} \mathcal{E}(K, H, \delta) &= \left\{ \left| \phi(x, a)^\top \hat{w}_h^k - r_h(x, a) - \mathbb{P}_h V_{h+1}^k(x, a) \right| \right. \\ &\quad \left. \leq 5H\sqrt{d}C_\delta \|\phi(x, a)\|_{(\Lambda_h^k)^{-1}}, \forall (h, k) \in [H] \times [K] \text{ and } \forall (x, a) \in \mathcal{S} \times \mathcal{A} \right\}. \end{aligned} \quad (17)$$

where we denote

$$C_\delta = \left[ \frac{1}{2} \log(K+1) + \log\left(\frac{2\sqrt{2}KB_{\delta/2}}{H}\right) + \log\frac{2}{\delta} \right]^{1/2}$$

and  $B_\delta = \left( \frac{16}{3} H d \sqrt{K} + \sqrt{\frac{2K}{3\beta_K \delta}} d^{3/2} \right)$ . Then we have  $\mathbb{P}(\mathcal{E}(K, H, \delta)) \geq 1 - \delta$ .

*Proof.* We refer readers to Lemma. B5. of (?) for the proof.  $\square$

**Lemma C.6.** *Let  $\lambda = 1$  in Eq 4. For any  $\delta \in (0, 1)$  conditioned on the event  $\mathcal{E}(K, H, \delta)$ , for all  $(h, k) \in [H] \times [K]$  and  $(x, a) \in \mathcal{S} \times \mathcal{A}$ , with probability at least  $1 - \delta^2$ , we have*

$$- (r_h(x, a) + \mathbb{P}_h V_{h+1}^k(x, a) - Q_h^k(x, a) l_h^k(x, a)) \quad (18)$$

$$\leq \left( 5H\sqrt{d}C_\delta + 5\sqrt{\frac{2d\log(1/\delta)}{3\beta_K}} + 4/3 \right) \|\phi(x, a)\|_{(\Lambda_h^k)^{-1}}, \quad (19)$$

where  $C_\delta$  is defined in Lemma C.5.

*Proof.* We refer readers to Lemma. B.6 of (?) for the proof.  $\square$

**Lemma C.7.** (Error bound). *Let  $\lambda = 1$  in Eq 4. For any  $\delta \in (0, 1)$  conditioned on the event  $\mathcal{E}(K, H, \delta)$ , for all  $(h, k) \in [H] \times [K]$  and  $(x, a) \in \mathcal{S} \times \mathcal{A}$ , with probability at least  $1 - \delta^2$ , we have*

$$-l_h^k(x, a) \leq \left( 5H\sqrt{d}C_\delta + 5\sqrt{\frac{2d\log(1/\delta)}{3\beta_K}} + 4/3 \right) \|\phi(x, a)\|_{(\Lambda_h^k)^{-1}} + \varepsilon_{t^*}, \quad (20)$$

*Proof.* using Lemma C.6 and Proposition C.4 we have:

$$\begin{aligned} & - \left( r_h(x, a) + \mathbb{P}_h \hat{V}_{h+1}^k(x, a) - Q_h^k(x, a) l_h^k(x, a) + \varepsilon_{t^*} \right) \\ & = l_h^k(x, a) - \varepsilon_{t^*} \leq \left( 5H\sqrt{d}C_\delta + 5\sqrt{\frac{2d\log(1/\delta)}{3\beta_K}} + 4/3 \right) \|\phi(x, a)\|_{(\Lambda_h^k)^{-1}} \end{aligned}$$

**Lemma C.8.** *Let  $\lambda = 1$  in Eq 4. Conditioned on the event  $\mathcal{E}(K, H, \delta)$ , for all  $(h, k) \in [H] \times [K]$  and  $(x, a) \in \mathcal{S} \times \mathcal{A}$ , with probability at least  $\frac{1}{2\sqrt{2e\pi}}$ , we have*

$$- (r_h(x, a) + \mathbb{P}_h V_{h+1}^k(x, a) - Q_h^k(x, a)) \leq 0 \quad (21)$$

*Proof.* We refer readers to Lemma. B.7 of (?) for the proof.  $\square$

**Lemma C.9.** (Optimism). *Let  $\lambda = 1$  in Eq 4. Conditioned on the event  $\mathcal{E}(K, H, \delta)$ , for all  $(h, k) \in [H] \times [K]$  and  $(x, a) \in \mathcal{S} \times \mathcal{A}$ , with probability at least  $\frac{1}{2\sqrt{2e\pi}}$ , we have*

$$l_h^k(x, a) \leq 0 \quad (22)$$

*Proof.* We immediately get the stated result by using Proposition C.4 on Lemma C.8.  $\square$

We restate the main theorem:

**Theorem C.10.** *Let  $\lambda = 1$  in Eq 4,  $\frac{1}{\beta_k} = \tilde{O}(H\sqrt{d})$  in Algorithm 2 and  $\delta \in \left(\frac{1}{2\sqrt{2e\pi}}, 1\right)$ . For any episode  $k \in [K]$ , let the learning rate  $\eta_k = 1 / (4\lambda_{\max}(\Lambda_h^k))$ , the update number for LMC in Eq ?? be  $J_k = 2\kappa_k \log(4HKd)$  where  $\kappa_k = \lambda_{\max}(\Lambda_h^k) / \lambda_{\min}(\Lambda_h^k)$  is the condition number of  $\Lambda_h^k$  defined in Proposition C.1. Under the assumption that the action-value function  $Q_h^k$  in Eq 3 has an  $L$ -Lipschitz continuous gradient and satisfies the Polyak-Łojasiewicz Inequality (PL) inequality Eq 8, the regret of Algorithm 2 under the regret definition in Definition 1, satisfies*

$$\text{Regret}(K) = \tilde{O}\left(d^{3/2}H^{3/2}\sqrt{T}\right), \quad (23)$$

with probability at least  $1 - \delta$ .

Proof of Theorem C.10. By Lemma. 4.2 in (?), it holds that

$$\text{Regret}(T) = \sum_{k=1}^K \left( V_1^* (x_1^k) - V_1^{\pi^k} (x_1^k) \right) \quad (24)$$

$$= \underbrace{\sum_{k=1}^K \sum_{t=1}^H \mathbb{E}_{\pi^*} [\langle Q_h^k(x_h, \cdot), \pi_h^*(\cdot | x_h) - \pi_h^k(\cdot | x_h) \rangle | x_1 = x_1^k]}_{(i)} + \underbrace{\sum_{k=1}^K \sum_{t=1}^H \mathcal{D}_h^k}_{(ii)} \quad (25)$$

$$+ \underbrace{\sum_{k=1}^K \sum_{t=1}^H \mathcal{M}_h^k}_{(iii)} + \underbrace{\sum_{k=1}^K \sum_{h=1}^H (\mathbb{E}_{\pi^*} [l_h^k(x_h, a_h) | x_1 = x_1^k] - l_h^k(x_h^k, a_h^k))}_{(iv)}, \quad (26)$$

where  $\langle \cdot, \cdot \rangle$  denotes inner product which in continuous spaces is defined as  $\langle f, g \rangle = \int_D f(t)g(t) dt$ . Furthermore,  $\mathcal{D}_h^k$  and  $\mathcal{M}_h^k$  are defined as

$$\begin{aligned} \mathcal{D}_h^k &:= \left\langle \left( Q_h^k - Q_h^{\pi^k} \right) (x_h^k, \cdot), \pi_h^k(\cdot, x_h^k) \right\rangle - \left( Q_h^k - Q_h^{\pi^k} \right) (x_h^k, a_h^k), \\ \mathcal{M}_h^k &:= \mathbb{P}_h \left( \left( V_{h+1}^k - V_{h+1}^{\pi^k} \right) (x_h^k, a_h^k) - \left( V_{h+1}^k - V_{h+1}^{\pi^k} \right) (x_h^k) \right). \end{aligned}$$

**Bounding Term (i):** Using Proposition C.3 we have  $Q(x_h, a^*) - Q(x_h, a_{t^*}) \leq \varepsilon_{t^*}$ .

Note that  $\pi_h^k$  is approximately greedy w.r.t  $Q_h^k$  and  $\pi_h^k(a_{t^*}) = 1$  where  $a_{t^*}$  is the approximate optimal greedy action from Eq 12. The largest value that  $\langle Q_h^k(x_h, \cdot), \pi_h^*(\cdot | x_h) - \pi_h^k(\cdot | x_h) \rangle$  in Eq 25 can take is  $Q(x_h, a^*) - Q(x_h, a_{t^*})$  which happens if  $\pi_h^*(a^*) = 1$  where  $a^* = \arg\max_a Q_h^k(x_h, a)$ . This completes the proof using Eq 12.

**Bound for Term (ii):** With probability  $1 - \delta/3$  we have:

$$\sum_{k=1}^K \sum_{h=1}^H \mathcal{D}_h^k \leq \sqrt{2H^2T \log(3/\delta)} \quad (27)$$

We refer the readers to the Appendix. B.2 of (?) for the proof.

**Bound for Term (iii):** With probability  $1 - \delta/3$  we have:

$$\sum_{k=1}^K \sum_{h=1}^H \mathcal{M}_h^k \leq \sqrt{2H^2T \log(3/\delta)}. \quad (28)$$

We refer the readers to the Appendix. B.2 of ? for the proof.

**Bound for Term (iv):** With probability at least  $\left(1 - \frac{\delta}{3} - \frac{1}{2\sqrt{2e\pi}}\right)$  we have:

$$\sum_{k=1}^K \sum_{h=1}^H (\mathbb{E}_{\pi^*} [l_h^k(x_h, a_h) | x_1 = x_1^k] - l_h^k(x_h^k, a_h^k)) \leq \tilde{O} \left( d^{3/2} H^{3/2} \sqrt{T} \right) \quad (29)$$

Suppose the event  $\mathcal{E}(K, H, \delta')$  holds. by union bound, with probability  $1 - \left(\delta'^2 + \frac{1}{2\sqrt{2e\pi}}\right)$ , we have,

$$\sum_{k=1}^K \sum_{h=1}^H (\mathbb{E}_{\pi^*} [l_h^k(x_h, a_h) \mid x_1 = x_1^k] - l_h^k(x_h^k, a_h^k)) \quad (30)$$

$$\leq \sum_{k=1}^K \sum_{h=1}^H -l_h^k(x_h^k, a_h^k) \quad (31)$$

$$\leq \sum_{k=1}^K \sum_{h=1}^H \left( 5H\sqrt{d}C_{\delta'} + 5\sqrt{\frac{2d\log(1/\delta')}{3\beta_K}} + 4/3 \right) \|\phi(x_h^k, a_h^k)\|_{(\Lambda_h^k)^{-1}} + KH\varepsilon_{t^*} \quad (32)$$

$$= \left( 5H\sqrt{d}C_{\delta'} + 5\sqrt{\frac{2d\log(1/\delta')}{3\beta_K}} + 4/3 \right) \sum_{k=1}^K \sum_{h=1}^H \|\phi(x_h^k, a_h^k)\|_{(\Lambda_h^k)^{-1}} + KH\varepsilon_{t^*} \quad (33)$$

$$\leq \left( 5H\sqrt{d}C_{\delta'} + 5\sqrt{\frac{2d\log(1/\delta')}{3\beta_K}} + 4/3 \right) \sum_{h=1}^H \sqrt{K} \left( \sum_{k=1}^K \|\phi(x_h^k, a_h^k)\|_{(\Lambda_h^k)^{-1}}^2 \right)^{1/2} + KH\varepsilon_{t^*} \quad (34)$$

$$\leq \left( 5H\sqrt{d}C_{\delta'} + 5\sqrt{\frac{2d\log(1/\delta')}{3\beta_K}} + 4/3 \right) H\sqrt{2dK\log(1+K)} + KH\varepsilon_{t^*} \quad (35)$$

$$= \left( 5H\sqrt{d}C_{\delta'} + 5\sqrt{\frac{2d\log(1/\delta')}{3\beta_K}} + 4/3 \right) \sqrt{2dHT\log(1+K)} + KH\varepsilon_{t^*} \quad (36)$$

$$= \left( 5H\sqrt{d}C_{\delta'} + 5\sqrt{\frac{2d\log(1/\delta')}{3\beta_K}} + 4/3 \right) \sqrt{2dHT\log(1+K)} + \left( d^{3/2}H^{3/2}\sqrt{T} \right) \quad (37)$$

$$= \tilde{O}\left(d^{3/2}H^{3/2}\sqrt{T}\right). \quad (38)$$

Here the first, the second, and the third inequalities follow from Lemma C.9, Lemma C.7 and the Cauchy-Schwarz inequality respectively. The last inequality follows from Lemma C.5 The last equality follows from  $\frac{1}{\sqrt{\beta_K}} = 10H\sqrt{d}C_{\delta'} + \frac{8}{3}$  which we defined in Lemma C.9. By Lemma C.7, the event  $\mathcal{E}(K, H, \delta')$  occurs with probability  $1 - \delta'$ . Thus, by union bound, the event  $\mathcal{E}(K, H, \delta')$  occurs and it holds that

$$\sum_{k=1}^K \sum_{h=1}^H (\mathbb{E}_{\pi^*} [l_h^k(x_h, a_h) \mid x_1 = x_1^k] - l_h^k(x_h^k, a_h^k)) \leq \tilde{O}\left(d^{3/2}H^{3/2}\sqrt{T}\right)$$

By applying union bound for (i), (ii), (iii) and (iv), the final regret bound is  $\tilde{O}\left(d^{3/2}H^{3/2}\sqrt{T}\right)$  with at least probability  $1 - \delta$  where  $\delta \in (\frac{1}{2\sqrt{2e\pi}}, 1)$ .

**Theorem C.11.** Let  $\lambda = 1$  in Eq 4,  $\frac{1}{\beta_k} = \tilde{O}(H\sqrt{d})$  in Algorithm 2 and  $\delta \in (\frac{1}{2\sqrt{2e\pi}}, 1)$ . For any episode  $k \in [K]$ , let the learning rate  $\eta_k = 1/(4\lambda_{\max}(\Lambda_h^k))$ , the update number for LMC in Eq ?? be  $J_k = 2\kappa_k \log(4HKd)$  where  $\kappa_k = \lambda_{\max}(\Lambda_h^k)/\lambda_{\min}(\Lambda_h^k)$  is the condition number of  $\Lambda_h^k$  defined in Proposition C.1. Let  $\vec{w} = [w_1, w_2, \dots, w_n]^T$  be the extended parameter space and  $Q(x, a) = \max_{i \in [n]} Q_{w_i}(x, a)$  be the optimistic action-value function. Under the assumption that the action-value function  $Q_h^k$  in Eq 3 has an  $L$ -Lipschitz continuous gradient and satisfies the Polyak-Lojasiewicz Inequality (PL) inequality Eq 8, the regret of Algorithm 2 under the regret definition in Definition 1, satisfies

$$\text{Regret}(K) = \tilde{O}\left(d^{3/2}H^{3/2}\sqrt{T}\right), \quad (39)$$

with probability of  $1 - \epsilon'$  for any  $\epsilon' \in (0, 1)$ .



Proof of Theorem C.11. In Lemma B.9 we prove that the estimation  $Q_h^k(x, a)$  is optimistic with a constant probability of at least  $\frac{1}{2\sqrt{2e\pi}}$ . In other words, the failure probability is at most  $1 - \frac{1}{2\sqrt{2e\pi}}$ . By extending the parameter space  $\vec{w} = [w_1, w_2, \dots, w_n]^T$  and modelling the optimistic action-value function using  $Q(x, a) = \max_{i \in [n]} Q_{w_i}(x, a)$ , the failure probability will be at most  $(1 - \frac{1}{2\sqrt{2e\pi}})^n$ . We want this probability to be arbitrarily small. To guarantee that the failure probability is less than  $\epsilon'$  it suffices to find an  $n$  that is large enough such that  $(1 - \frac{1}{2\sqrt{2e\pi}})^n < \epsilon'$ . If we solve for  $n$  we have  $n > \frac{\log \epsilon'}{\log(1 - \frac{1}{2\sqrt{2e\pi}})}$ . We can express the latter quantity as  $\frac{\log(1/\delta)}{\log(2\sqrt{2e\pi}) - \log(2\sqrt{2e\pi} - 1)} \in \Omega(\log(1/\epsilon'))$ . So, we can extend the parameter space by a factor of  $\Omega(\log(1/\epsilon'))$  to ensure that the failure probability is less than  $\epsilon'$ . Finally, we can apply the union bound on (i), (ii), (iii), and (iv) to conclude that the regret bound in Theorem C.11 holds with a probability of  $1 - \epsilon'$  for any  $\epsilon' \in (0, 1)$ .
